# Supplementary material for: Nanoscale heterogeneity of arsenic and selenium species in coal fly ash particles: analysis using enhanced spectroscopic imaging and speciation techniques
Source: Royal Society of Chemistry journal article supplement (doi:10.1039/d2en01056a), 2023-01-01
Supplement: d2en01056a1.pdf [file d2en01056a1.pdf]

**Supporting Information for:**

**Nanoscale heterogeneity of arsenic and selenium species in coal fly ash particles: Analysis using enhanced spectroscopic imaging and speciation techniques**

Nelson A. Rivera, Jr<sup>1\*</sup>, Florence T. Ling<sup>2,4</sup>, Zehao Jin<sup>1</sup>, Ajith Pattammattel<sup>3</sup>, Hanfei Yan<sup>3</sup>, Yong S. Chu<sup>3</sup>, Catherine Peters<sup>2</sup>, Heileen Hsu-Kim<sup>1\*</sup>

<sup>1</sup> Department of Civil and Environmental Engineering, Box 90287, Duke University, Durham, North Carolina 27708, United States

<sup>2</sup> Department of Civil and Environmental Engineering, Princeton University, Princeton, New Jersey 08544, United States

<sup>3</sup> National Synchrotron Light Source II, Brookhaven National Laboratory, Upton, NY 11973, United States

<sup>4</sup>Environmental Science Program, Department of Chemistry and Biochemistry, La Salle University, Philadelphia, PA 19141, United States

\*To whom correspondence should be addressed: [nelson.rivera@duke.edu](mailto:nelson.rivera@duke.edu), [hsukim@duke.edu](mailto:hsukim@duke.edu)

***Supporting Information includes:***

Figure S1: Elemental maps for App#1 (also shown in Figure 2B/3B)

Figure S2: Elemental maps for App#1 (Figure 2C)

Figure S3: Elemental maps for PRB#1 (Figure 2D/3C)

Figures: 3

Total pages: 4

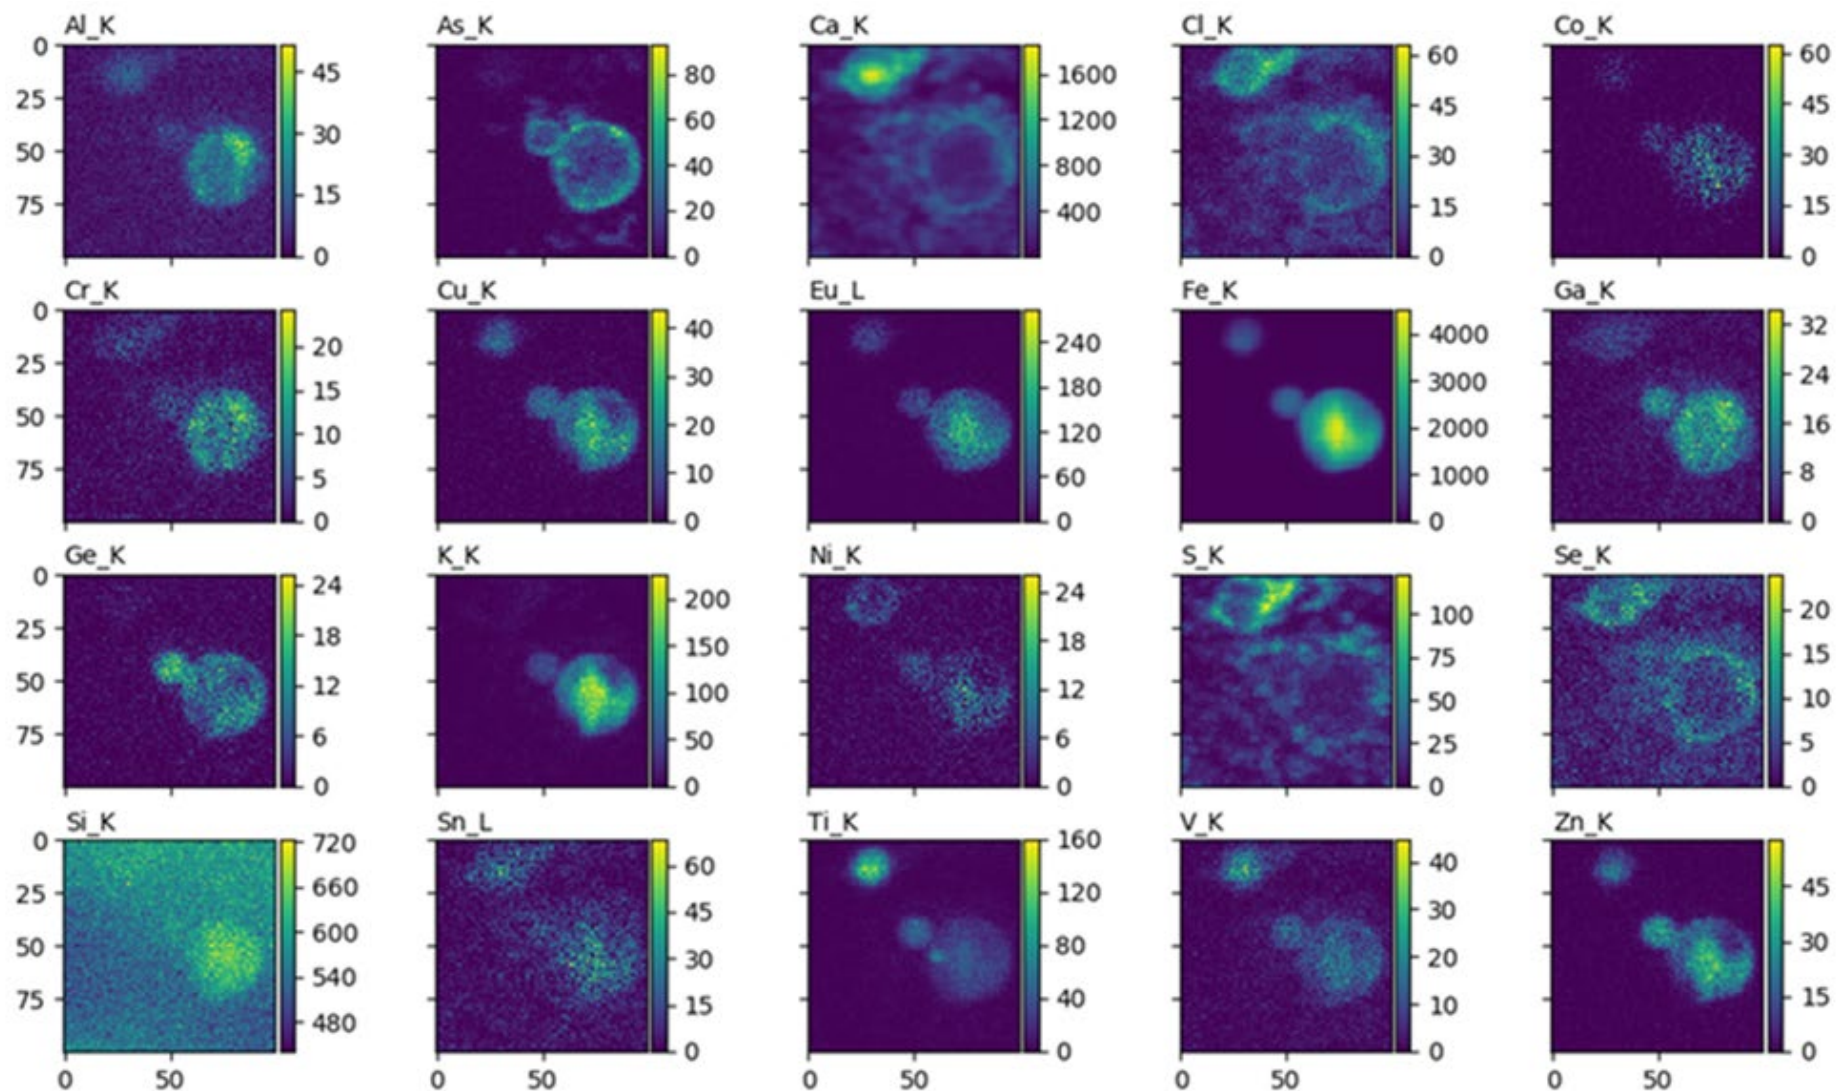

**Figure S1.** Elemental maps showing the distribution of elements identified for App#1 (manuscript Figures 2B/3B). The x- and y-axes (left) are pixel coordinates in  $\mu\text{m}$ . The y-axis (right) shows signal intensity with yellow indicated greater relative intensity of the given element.

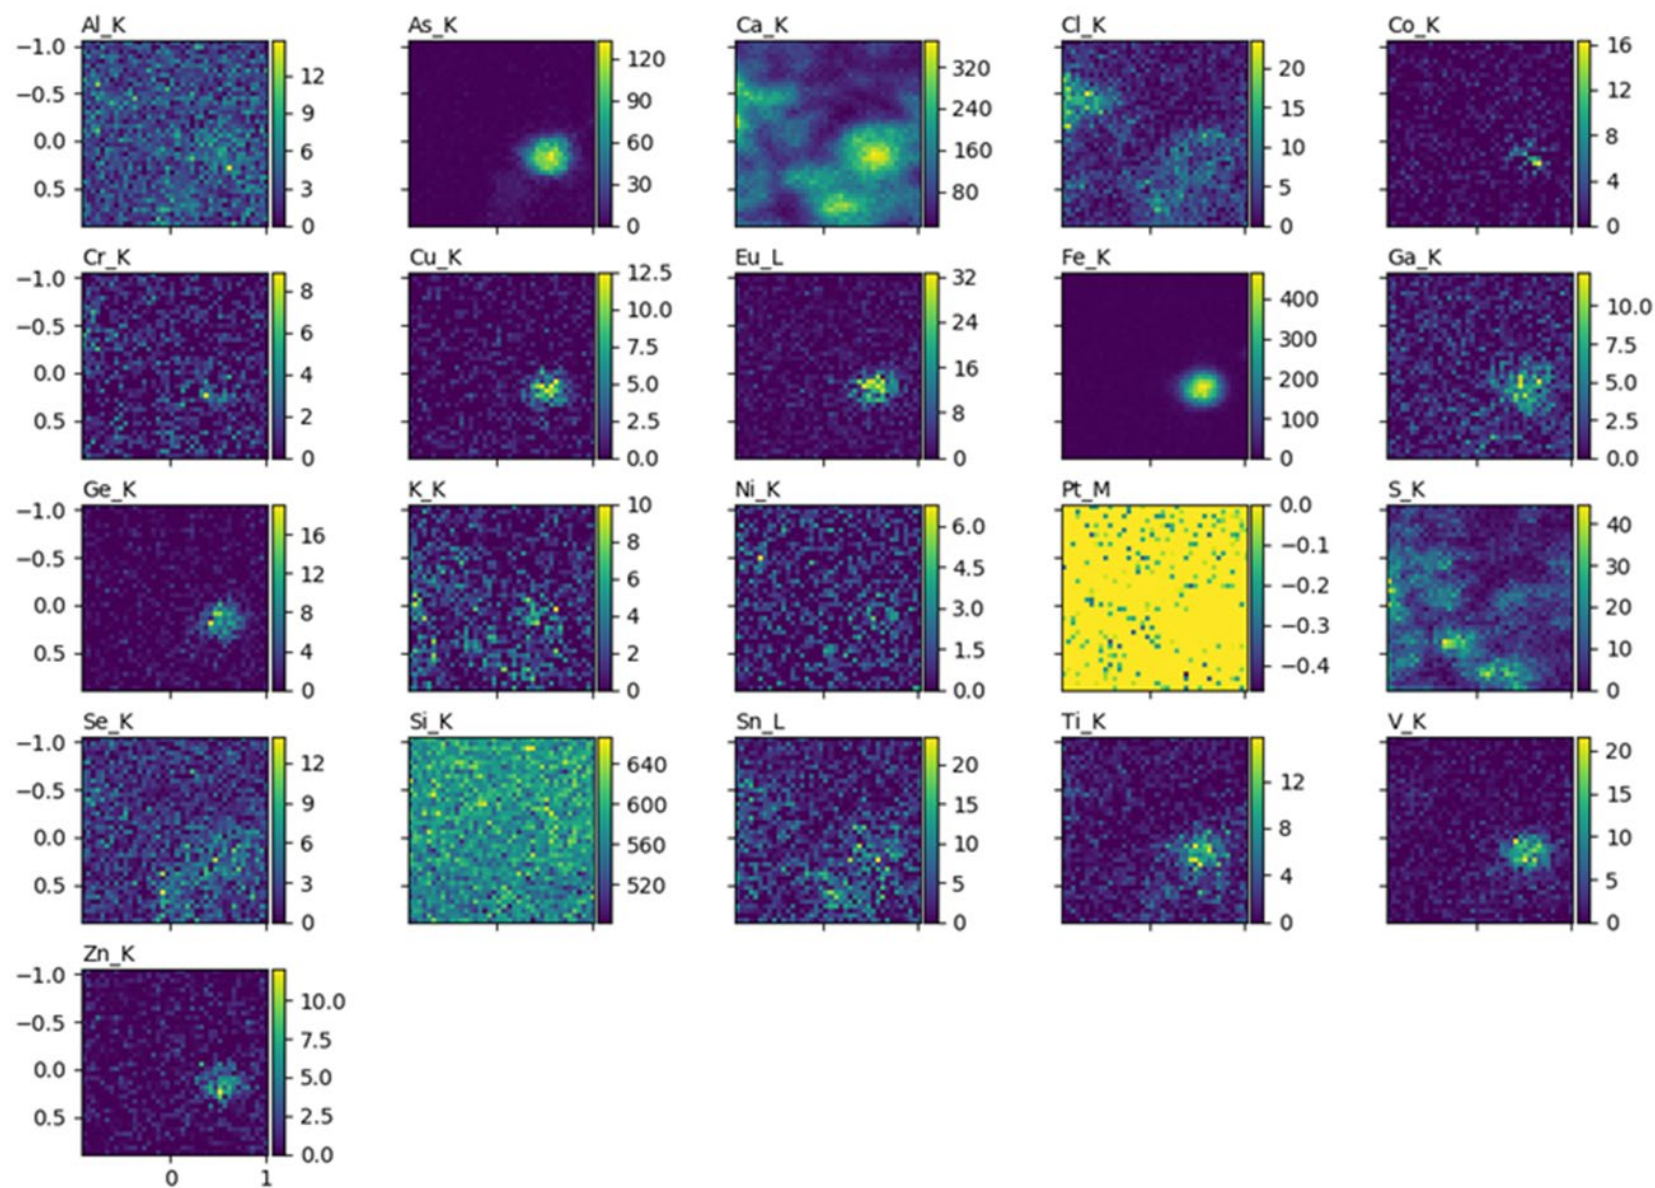

**Figure S2.** Elemental maps showing the distribution of elements identified for App#1 (manuscript Figures 2C). The x- and y-axes (left) are pixel coordinates in  $\mu\text{m}$ . The y-axis (right) shows signal intensity with yellow indicated greater relative intensity of the given element.



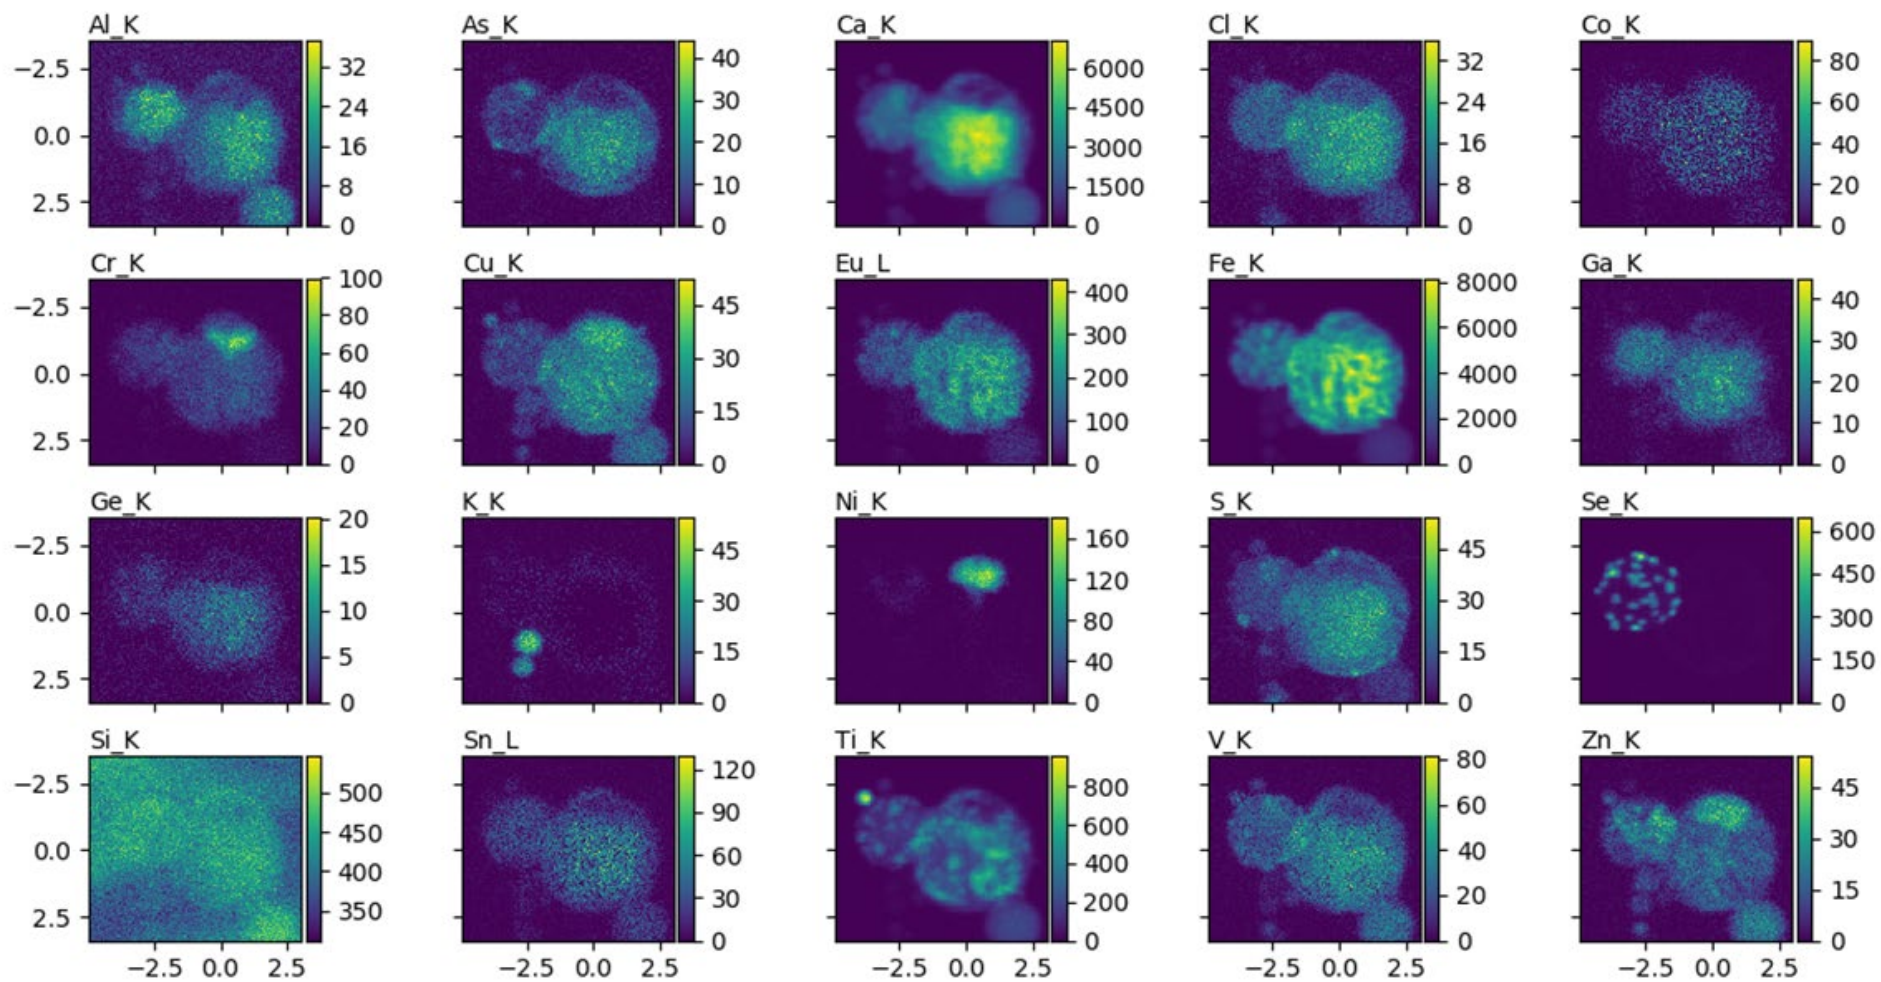

**Figure S3.** Elemental maps showing the distribution of elements identified for PRB#1 (manuscript Figures 2D/3C). The x- and y-axes (left) are pixel coordinates in  $\mu\text{m}$ . The y-axis (right) shows signal intensity with yellow indicated greater relative intensity of the given element.
